# Supplementary material
Source: PubMed Central journal article supplement (PMC6413798)
Supplement: jciinsight-4-122939-s065.pdf [file jciinsight-4-122939-s065.pdf]

## Supplementary Materials

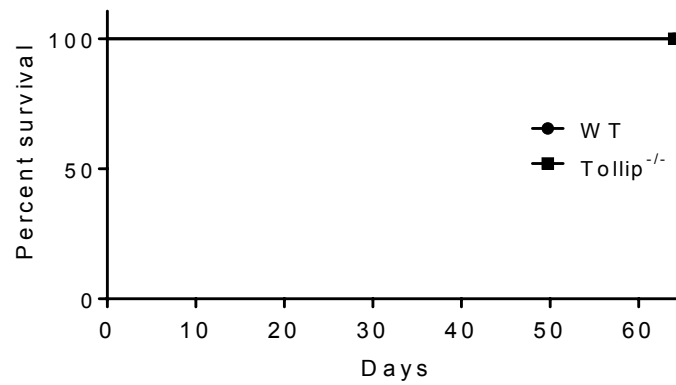

**Supplementary Figure 1. Survival curve.** Representative survival curve of WT and Tollip<sup>-/-</sup> mice treated with AOM-DSS treatment. N=5 each group.

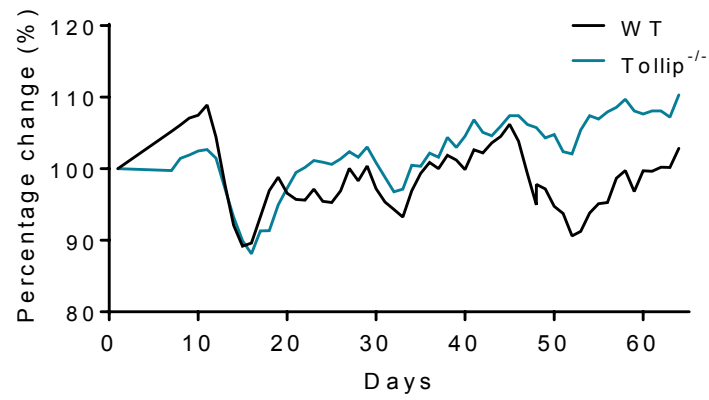

**Supplementary Figure 2. Body weight change.** Body weight change curves of WT and Tollip<sup>-/-</sup> mice during AOM-DSS treatment. N=5 each group, and values were expressed as means.

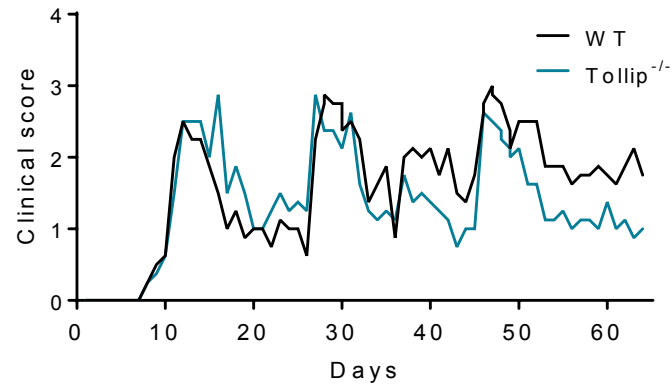

**Supplementary Figure 3. Stool clinical score evaluations.** Stool clinical scores including stool consistency and bleeding of WT and Tollip<sup>-/-</sup> mice. N=8, values were expressed as means.

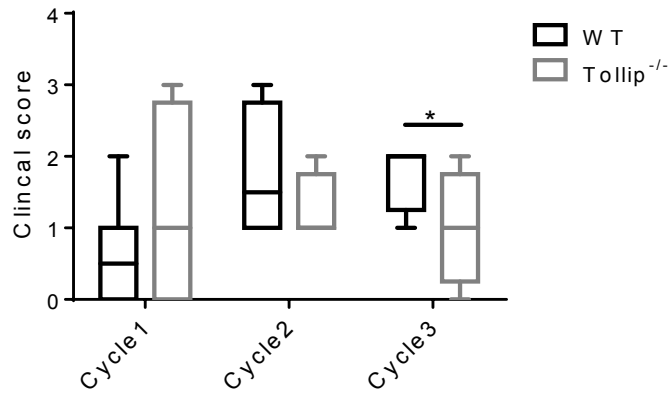

**Supplementary Figure 4. Comparison of stool clinical scores.** Stool clinical scores including stool consistency and bleeding of WT and Tollip<sup>-/-</sup> mice were collected and compared at the end of each cycle (rest day 14). N=8, values were expressed as means± SD. \* p<0.05.

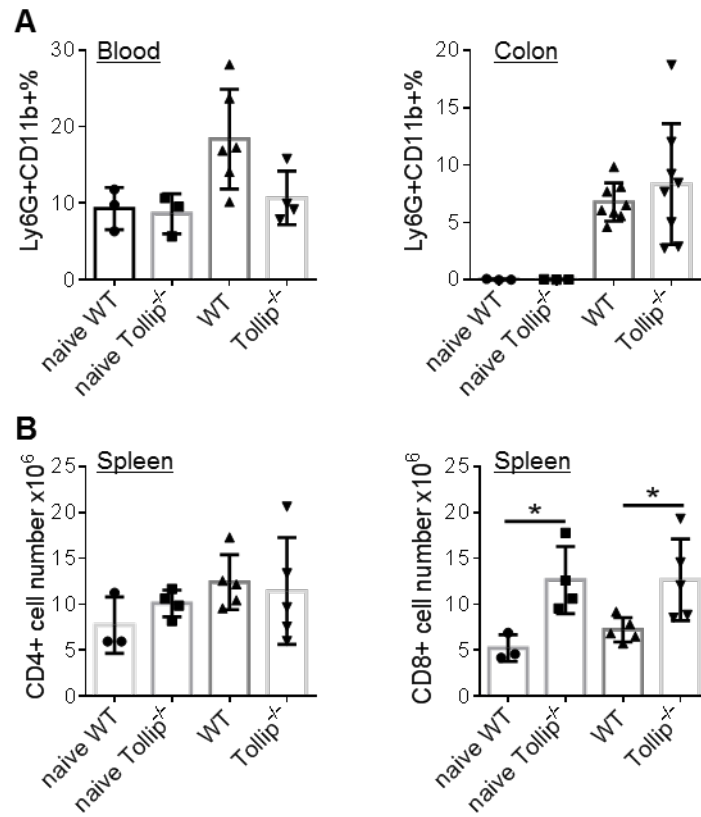

**Supplementary Figure 5. Elevated T cell population was observed in Tollip deficiency mice.** (A) Neutrophil (Ly6G+CD11b+) percentages in the blood and colon from naïve WT and Tollip<sup>-/-</sup> mice, or AOM-DSS treated WT and Tollip<sup>-/-</sup> mice. (B) CD4+ and CD8+ cell counts in the spleens from WT or Tollip<sup>-/-</sup> mice with AOM-DSS treatment or naïve mice. \* p<0.05.

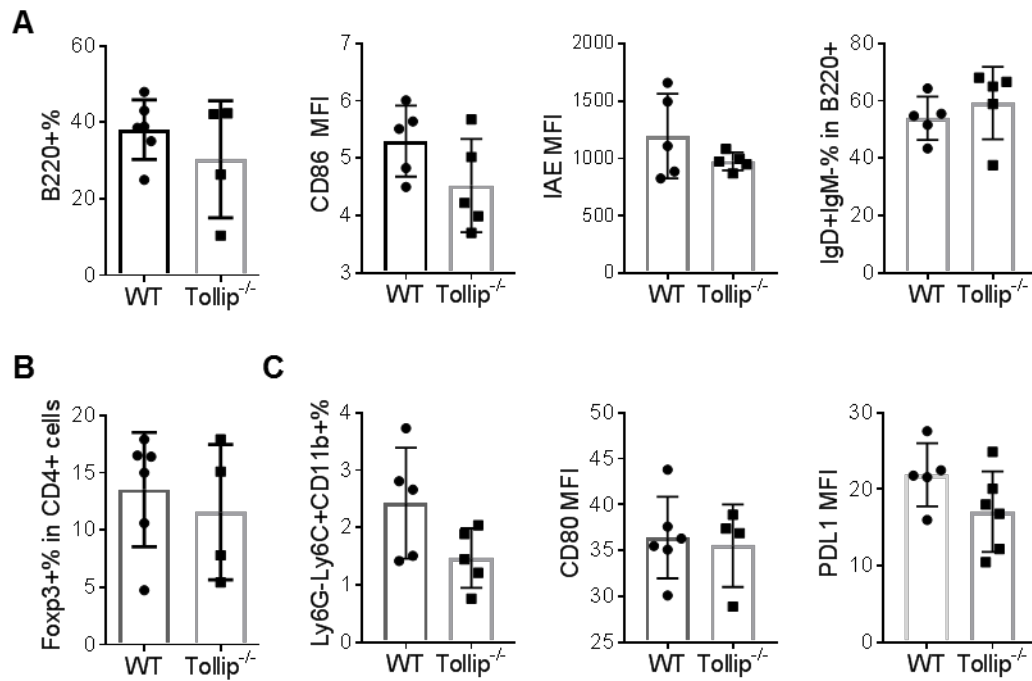

**Supplementary Figure 6. Examination of immune cells in mice treated with AOM-DSS.** Percentages and surface molecules of B cells (A), T cells (B), and monocytes (C) in the spleen from AOM-DSS treated WT and Tollip<sup>-/-</sup> mice.

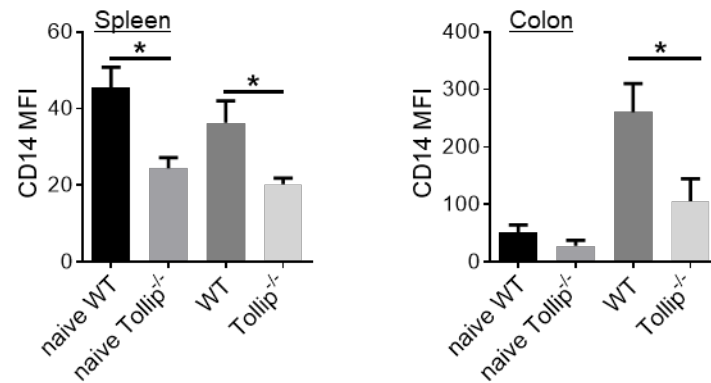

**Supplementary Figure 7. Reduced CD14 expression on Tollip deficient neutrophils.** CD14 expression on neutrophils from spleen or colon in naïve WT and Tollip<sup>-/-</sup> mice, or AOM-DSS treated WT and Tollip<sup>-/-</sup> mice was examined by flow cytometry. \* p<0.05.

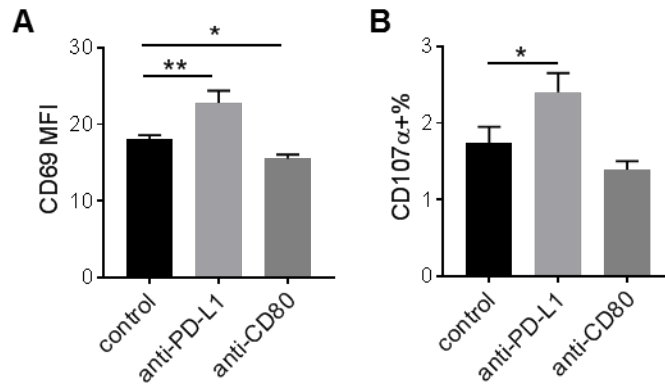

**Supplementary Figure 8. The modulation of T cell activation by neutrophils through PD-L1/CD80.** In the presence of anti-PD-L1 or anti-CD80 antibodies, splenocytes were co-cultured with GM-CSF primed neutrophils in the anti-CD3 antibody coated plates for 24 hours, then CD69 levels on CD4+ T cells were measured by flow cytometry (A). CD107a positive cells were analyzed in CD8+ cells (B). \* p<0.05; \*\* p<0.01.

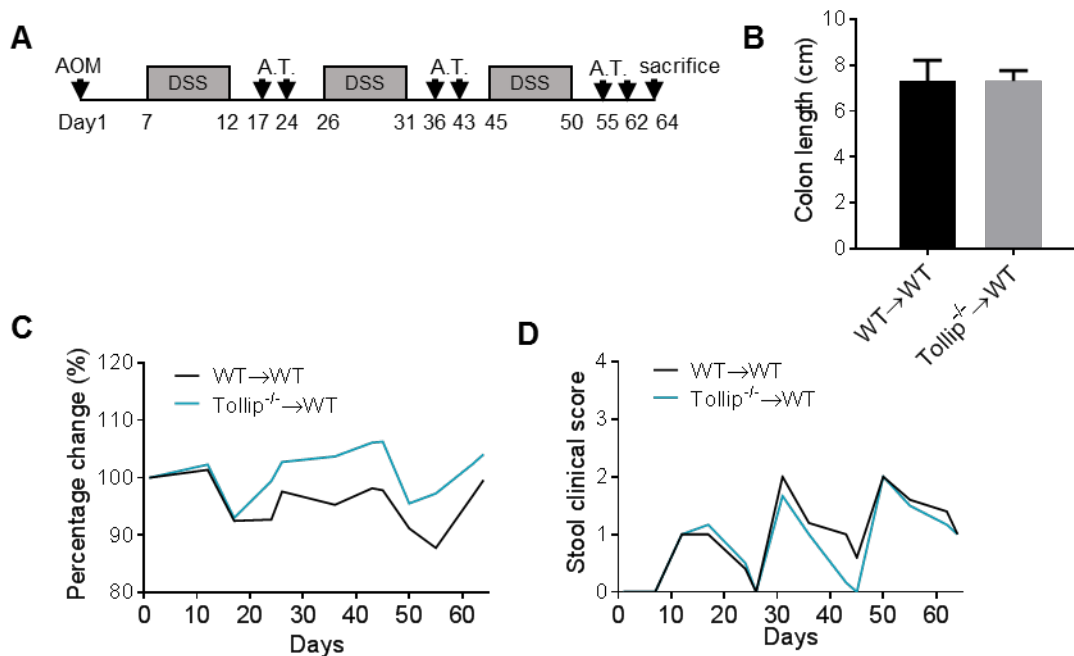

**Supplementary Figure 9.** (A) Schematic protocol of AOM-DSS treatment with adoptive transfer (A.T.) of WT or Tollip<sup>-/-</sup> neutrophils to WT mice. (B) Colon length at the end of AOM-DSS regimen from the mice which received WT or Tollip<sup>-/-</sup> neutrophils. (C) Body weight change curves of the recipient mice which received WT or Tollip<sup>-/-</sup> neutrophils during AOM-DSS treatment. (D) Stool clinical scores including stool consistency and bleeding of the mice which received WT or Tollip<sup>-/-</sup> neutrophils.

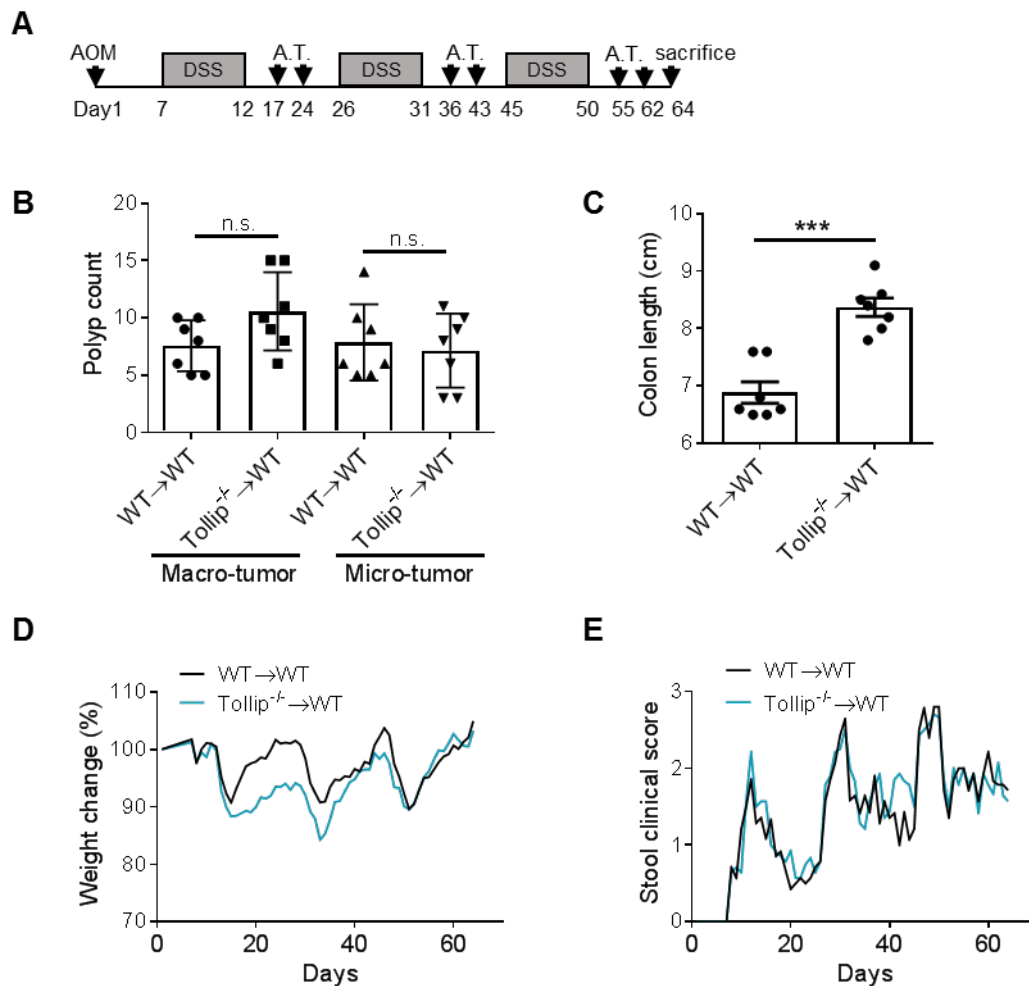

**Supplementary Figure 10. Adoptive transfer of Tollip<sup>-/-</sup> monocytes to WT mice. (A)** Schematic protocol of AOM-DSS treatment with adoptive transfer (A.T.) of WT or Tollip<sup>-/-</sup> monocytes to WT mice. **(B)** Tumor burden in WT mice which received WT or Tollip<sup>-/-</sup> monocytes. **(C)** Colon length at the end of AOM-DSS regimen from mice which received WT or Tollip<sup>-/-</sup> monocytes. **(D)** Body weight change curves of the mice which received WT or Tollip<sup>-/-</sup> monocytes during AOM-DSS treatment. **(E)** Stool clinical scores including stool consistency and bleeding of the mice which received WT or Tollip<sup>-/-</sup> monocytes. \*\*\*  $p < 0.01$ .
